# Supplementary material for: Two in one sweep: aluminum tolerance and grain yield in P-limited soils are associated to the same genomic region in West African Sorghum
Source: PubMed Central journal article supplement (PMC4256928; doi:10.1186/s12870-014-0206-6), 2014-08-12
Supplement: 12870_2014_206_MOESM1_ESM.pdf [file 12870_2014_206_MOESM1_ESM.pdf]

**Table S1:** Single environment analysis results: the different genotype sets (GenoSet), number of genotypes tested within each set (#Geno), environmental zone in which the experiments were conducted (Zone), name of the environment as site-year combination (Site-Year), phosphorus treatment (P-level), grand mean for grain yield (Mean), genetic variance component ( $\sigma^2G$ ), genetic coefficient of variation (GCV), residual variance component ( $\sigma^2_{\text{error}}$ ), standardized variance of a difference across all genotype pairs (stdzaVD) and repeatability estimate ( $w^2$ ).

| GenoSet | #Geno | Zone <sup>†</sup> | Site-Year       | P-level | Mean   | $\sigma^2G$ | GCV   | $\sigma^2_{\text{error}}$ | stdzaVD | $w^2$ <sup>‡</sup> |
|---------|-------|-------------------|-----------------|---------|--------|-------------|-------|---------------------------|---------|--------------------|
| 1       | 70    | Sud               | Kolombada2006   | +P      | 115.80 | 489.00      | 19.10 | 1015.00                   | 18.00   | 0.69               |
| 1       | 70    | Sud               | Kolombada2006   | -P      | 84.60  | 267.80      | 19.30 | 756.60                    | 18.40   | 0.69               |
| 1       | 70    | Sud               | Kolombada2007   | +P      | 85.40  | 848.30      | 34.10 | 709.80                    | 21.70   | 0.83               |
| 1       | 70    | Sud               | Kolombada2007*  | -P      | 35.20  | 1.69        | 21.90 | 0.11                      | 18.20   | 0.74               |
| 1       | 70    | Sud               | Kolombada2008   | +P      | 157.30 | 578.20      | 15.30 | 770.40                    | 11.70   | 0.77               |
| 1       | 70    | Sud               | Kolombada2009   | +P      | 177.40 | 1953.00     | 24.90 | 2052.00                   | 13.60   | 0.87               |
| 1       | 70    | Sud               | Kolombada2009   | -P      | 100.50 | 1026.30     | 31.90 | 990.60                    | 25.50   | 0.76               |
| 1       | 70    | Sud               | Samanko2006     | +P      | 192.20 | 1852.00     | 22.40 | 1050.00                   | 13.00   | 0.86               |
| 1       | 70    | Sud               | Samanko2006     | -P      | 118.80 | 1370.00     | 31.20 | 1067.00                   | 16.90   | 0.87               |
| 1       | 70    | Sud               | Samanko2007     | -P      | 37.10  | 162.50      | 34.40 | 196.90                    | 31.50   | 0.70               |
| 1       | 70    | Sud               | Samanko2008     | -P      | 111.60 | 709.30      | 23.90 | 988.30                    | 18.50   | 0.77               |
| 1       | 70    | Sud               | Samanko2009     | +P      | 299.70 | 4910.00     | 23.40 | 4113.00                   | 14.40   | 0.84               |
| 1       | 70    | Sud               | Samanko2009     | -P      | 130.00 | 2475.00     | 38.30 | 1877.00                   | 22.10   | 0.86               |
| 1       | 70    | Sud               | Samanko2010     | +P      | 202.00 | 1817.00     | 21.10 | 1677.00                   | 14.40   | 0.81               |
| 1       | 70    | Sud               | Samanko2010     | -P      | 98.10  | 797.00      | 28.80 | 1099.00                   | 22.00   | 0.77               |
| 2       | 80    | Sah               | Bema2010        | +P      | 249.80 | 4689.00     | 27.41 | 2340.00                   | 14.98   | 0.87               |
| 2       | 80    | Sah               | Bema2010        | -P      | 141.10 | 3091.00     | 39.39 | 1899.00                   | 23.09   | 0.85               |
| 2       | 80    | Sah               | Bambey2012      | +P      | 95.22  | 2088.00     | 47.99 | 1069.00                   | 25.09   | 0.88               |
| 2       | 80    | Sah               | Bambey2012      | -P      | 61.69  | 893.70      | 48.46 | 579.20                    | 29.82   | 0.84               |
| 2       | 80    | Sah               | Ssa-Maradi2012* | +P      | 10.00  | 0.20        | 45.02 | 0.15                      | 28.37   | 0.83               |
| 2       | 80    | Sah               | Ssa-Maradi2012* | -P      | 4.05   | 0.15        | 64.59 | 0.17                      | 53.15   | 0.75               |
| 2       | 80    | Sah               | Samanko2012     | +P      | 137.00 | 1714.00     | 30.23 | 1315.00                   | 19.66   | 0.83               |
| 2       | 80    | Sah               | Samanko2012     | -P      | 109.10 | 818.00      | 26.22 | 544.50                    | 15.92   | 0.84               |
| 2       | 80    | Sah               | Bema2012        | +P      | 106.90 | 2137.00     | 43.26 | 2206.00                   | 31.81   | 0.79               |
| 2       | 80    | Sah               | Bema2012        | -P      | 87.17  | 1215.00     | 39.99 | 2509.00                   | 40.91   | 0.66               |
| 3       | 60    | Sud               | Samanko2011     | +P      | 258.30 | 3134.00     | 21.67 | 3381.00                   | 17.97   | 0.74               |
| 3       | 60    | Sud               | Samanko2011     | -P      | 111.90 | 1494.00     | 34.54 | 980.30                    | 21.36   | 0.84               |
| 3       | 60    | Sud               | Samanko2012     | +P      | 216.20 | 5285.00     | 33.63 | 4372.00                   | 22.64   | 0.82               |
| 3       | 60    | Sud               | Samanko2012     | -P      | 157.00 | 2085.00     | 29.09 | 1332.00                   | 17.34   | 0.85               |

<sup>†</sup>Sud= Sudanian, Sah=Sahelian (see Figure S10); \*data transformation applied, hence small variance components, means were back-transformed. <sup>‡</sup>Equation 19 in Piepho, H.-P., and J. Möhring. 2007. Computing heritability and selection response from unbalanced plant breeding trials. *Genetics*. 177: 1881–1888. doi:10.1534/genetics.107.074229.
