# Supplementary material for: Two in one sweep: aluminum tolerance and grain yield in P-limited soils are associated to the same genomic region in West African Sorghum
Source: PubMed Central journal article supplement (PMC4256928; doi:10.1186/s12870-014-0206-6), 2014-08-12

Chr1

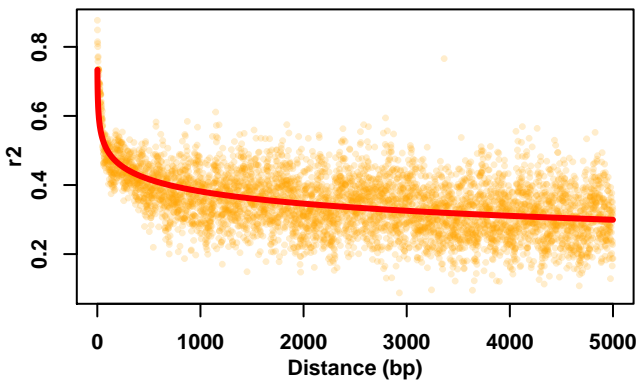

Chr2

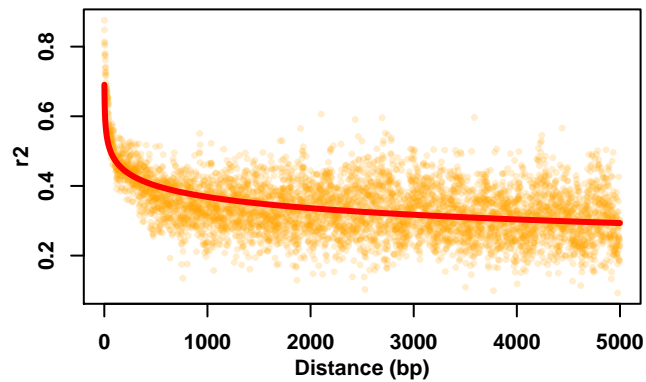

Chr3

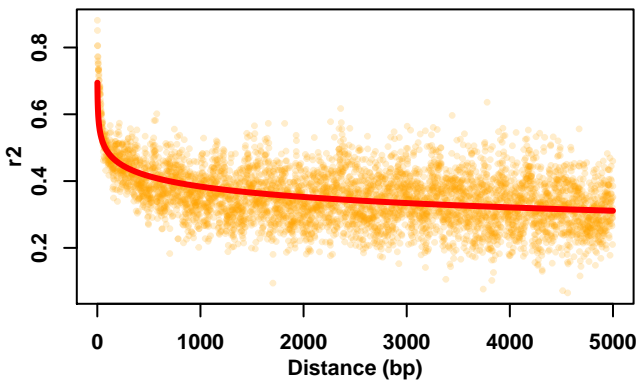

Chr4

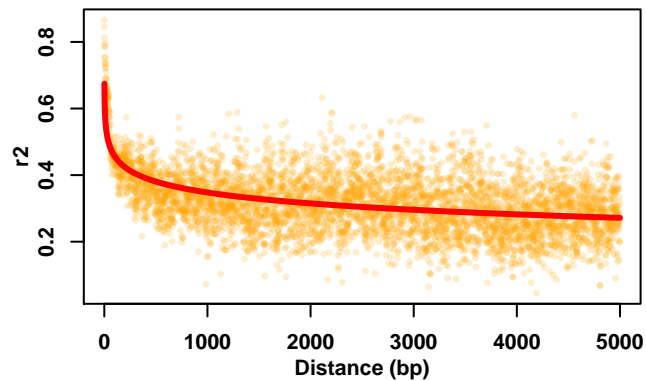

Chr5

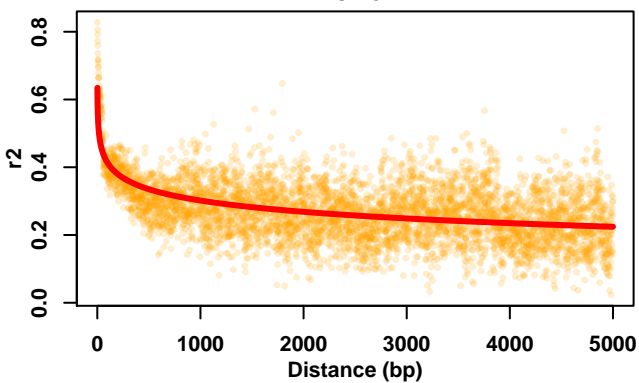

Chr6

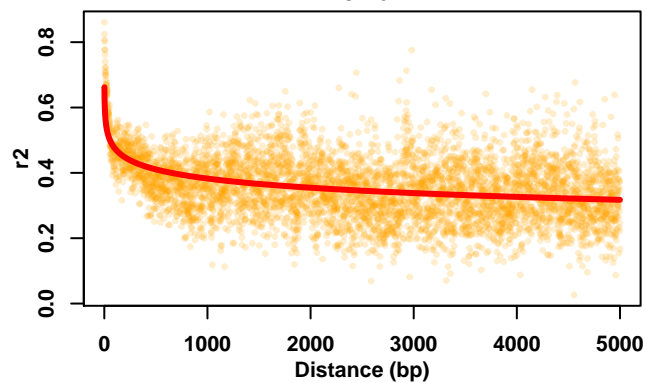

Chr7

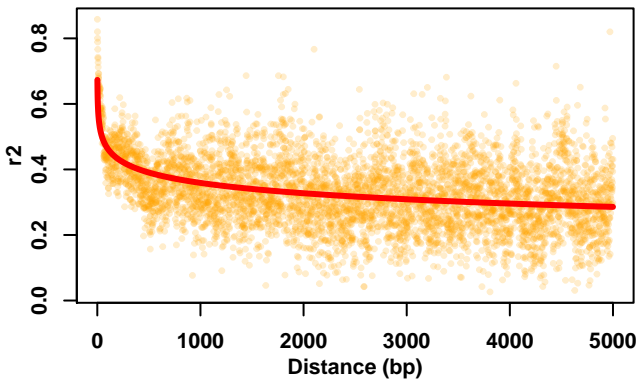

Chr8

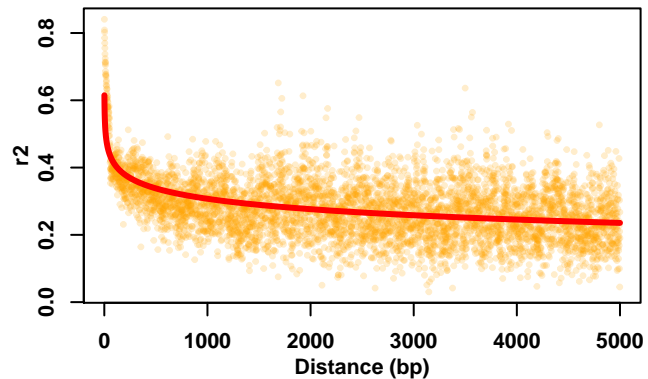

Chr9

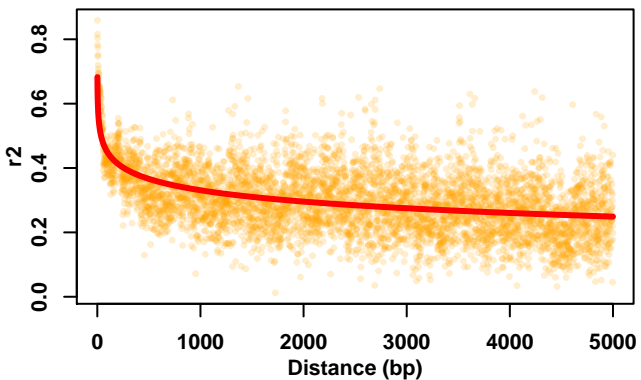

Chr10

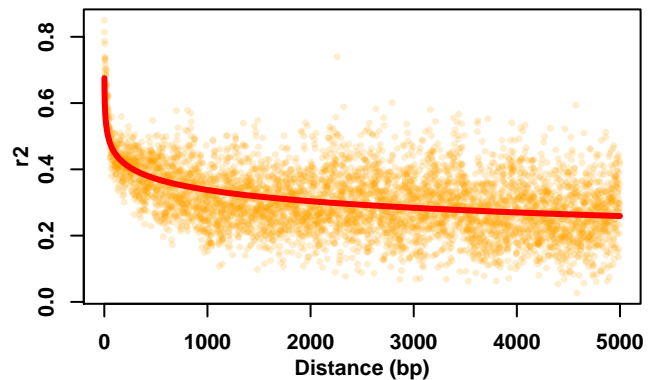

Supplement: 12870_2014_206_MOESM5_ESM.pdf [file 12870_2014_206_MOESM5_ESM.pdf]
