# Supplementary material for: Two in one sweep: aluminum tolerance and grain yield in P-limited soils are associated to the same genomic region in West African Sorghum
Source: PubMed Central journal article supplement (PMC4256928; doi:10.1186/s12870-014-0206-6), 2014-08-12
Supplement: 12870_2014_206_MOESM7_ESM.pdf [file 12870_2014_206_MOESM7_ESM.pdf]

# K = 3

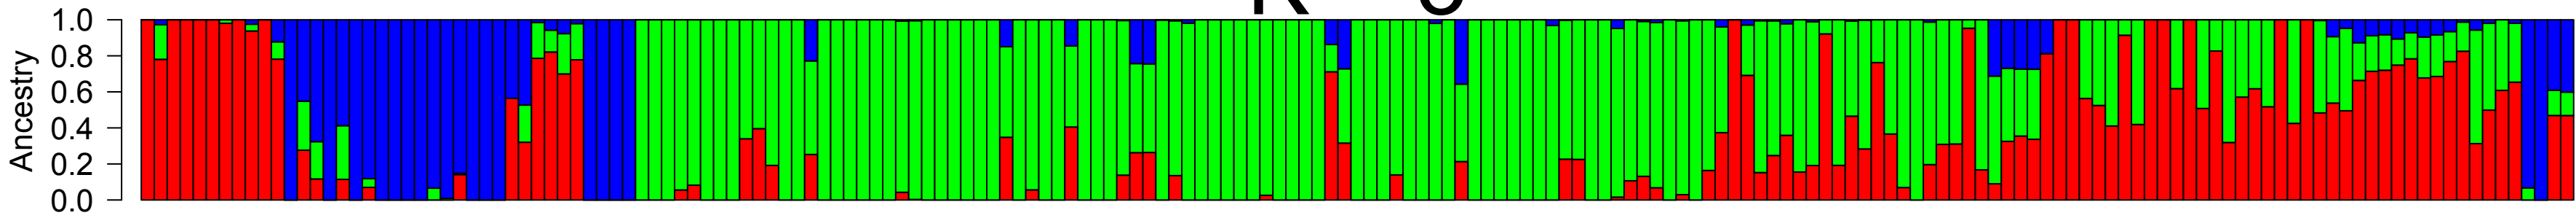

# K = 5

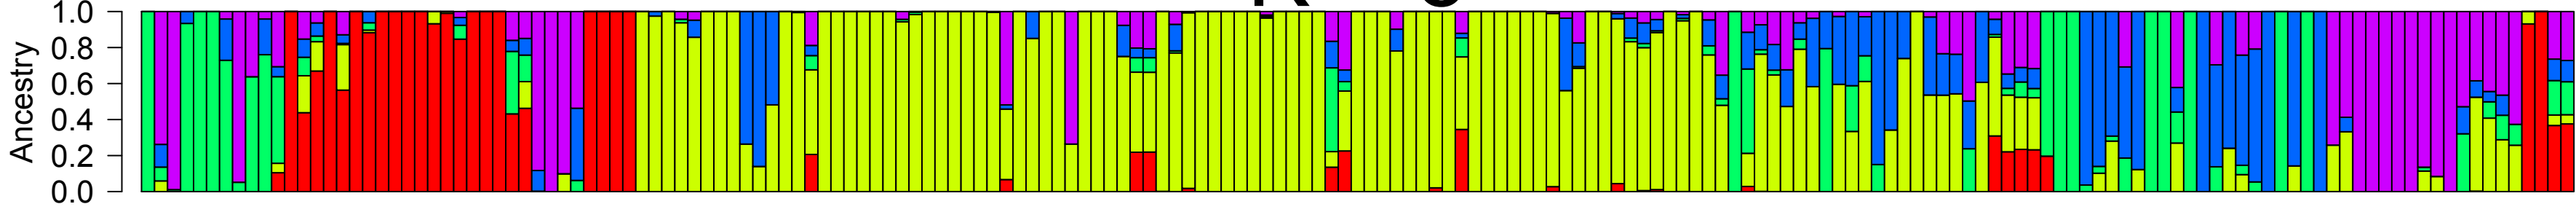

# K = 7

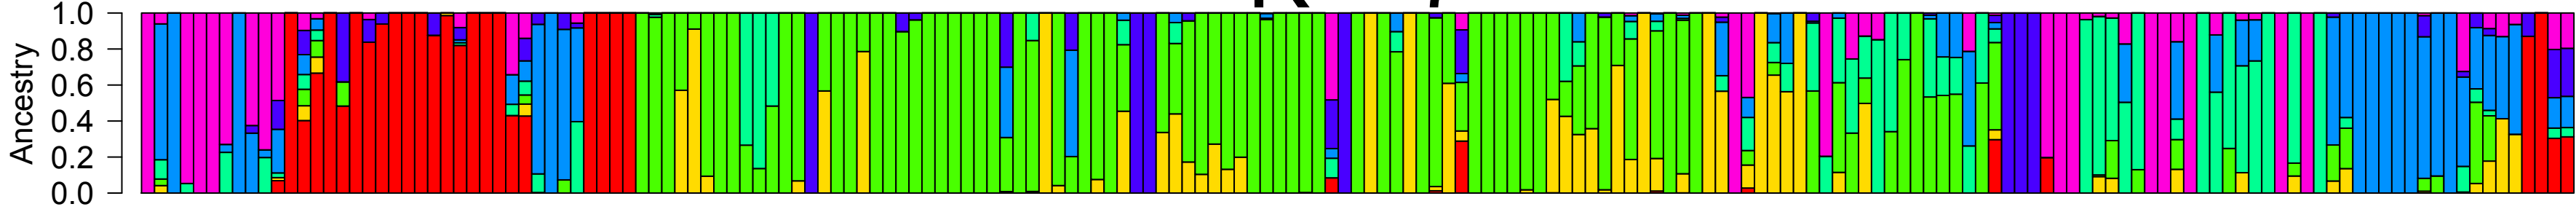

| Name                             | Race |
|----------------------------------|------|
| KALABAN (00-KO-F5DT-19)          | C    |
| GRINKAN                          | C    |
| TIANDOUGOU (98-SB-F2-78)         | C    |
| 00-CZ-F5P-25                     | C    |
| 00-SB-F5DT-5                     | C    |
| 00-CZ-F5P-135                    | C    |
| MALISOR-92-1                     | C    |
| 03-SB-FDT-105                    | C    |
| ARE MADEPOYI                     | C    |
| DANG-DONLONG                     | C    |
| GNE'QUE(NIE'GUE)                 | C    |
| V328 JENJARI                     | D    |
| V444 JENJARI                     | D    |
| S178 MATCHÉ DA KOUNGNA           | D    |
| S378_EL_KOUFQUMBASSAU            | D    |
| S474_KAOURA                      | D    |
| MDK                              | D    |
| MOTA JA                          | D    |
| LEPON RAKUMI-3                   | D    |
| FARA DAWA                        | D    |
| LANKONSOU                        | D    |
| MACHE DAKUMYA                    | D    |
| EL MACIKA                        | D    |
| MOTA FARA                        | D    |
| JA DAWA                          | D    |
| LONKONSA                         | D    |
| GADIABA                          | D    |
| LAKAHERI                         | D    |
| 08-BE-F5P-4                      | D    |
| KELA(P COMPACTE) / CE180-33      | D    |
| SSV2006008(ZABUWA)*GRINKAN-2-4   | DGC  |
| SSV2006008(ZABUWA)*GRINKAN-2-5   | DGC  |
| SSV2006008(ZABUWA)*GRINKAN-6-2   | DGC  |
| (SAMBALIMA(6)04-SIR F5T-35)-1-1  | DMam |
| S385_MAKAHO DA WAYO              | DMam |
| DAWA MAKAFO-2                    | DMam |
| DAWA MAKAFO-7                    | DMam |
| MAKAFON DAWA                     | DMam |
| BIBALWILI DE TIORIBOUGOU         | G    |
| SAKOYKA-BA                       | G    |
| DAGNAILI KOSSUROU                | G    |
| MIPSOR 90-30-23                  | G    |
| CGM 199-1-1                      | G    |
| CSM 660                          | G    |
| CSM 485                          | G    |
| CSM 335                          | G    |
| DARRELL KEN                      | G    |
| N'TENIMISSA                      | G    |
| WASSA                            | G    |
| 5147 OR                          | G    |
| CMDT 45                          | G    |
| KENDE YENKO                      | G    |
| FOLOMBA                          | G    |
| IPSO01                           | G    |
| FAMBE                            | G    |
| CSM 219                          | G    |
| SGBA-A                           | G    |
| SGBA-D                           | G    |
| SGBA-E                           | G    |
| DIO-A                            | G    |
| DOUA-B                           | G    |
| DOUA-G                           | G    |
| S1-5                             | G    |
| B1-2                             | G    |
| B2-3                             | G    |
| B2-5                             | G    |
| IS 30804                         | G    |
| BOBODJÉ                          | G    |
| 97-SB-F5DT-138 (FAUX)            | G    |
| CSM-63E                          | G    |
| IS 25650                         | G    |
| IS 15401                         | G    |
| IS 26077                         | G    |
| CSM388                           | G    |
| IS 6745BF                        | G    |
| SEGUEYANA CZ 24/25               | G    |
| SI 22                            | G    |
| SL22-1                           | G    |
| SL118                            | G    |
| SL291                            | G    |
| SL328                            | G    |
| SL330                            | G    |
| SL331                            | G    |
| SL337                            | G    |
| SL339                            | G    |
| SL816                            | G    |
| 50-32                            | G    |
| 62-12                            | G    |
| 92-53                            | G    |
| 92-54                            | G    |
| 92-62                            | G    |
| S165_SOCOMBA                     | G    |
| EL DELE                          | G    |
| KENIKEDJÉ                        | G    |
| SOUFIGNÉ KINTI                   | G    |
| NONITELI                         | G    |
| KENIGUEDJÉ                       | G    |
| HAMOBÉRO                         | G    |
| GADIABADIN TEROW                 | G    |
| KENINGUE KANDIA                  | G    |
| WERENOU                          | G    |
| KENINGUE                         | G    |
| KAUSSOULOU                       | G    |
| BARO                             | G    |
| KENINGUE SOUROU                  | G    |
| DIARRALAKANIO                    | G    |
| HAMABIO                          | G    |
| YALADIAN                         | G    |
| KENIKE                           | G    |
| 08-BE-F5P-51                     | G    |
| 08-BE-F5P-15                     | G    |
| MADAME                           | G    |
| EMENA BANKO                      | G    |
| YELICO KOULE (BLANC)             | G    |
| HINA                             | G    |
| LATA                             | G    |
| TOROBA                           | G    |
| KAYAKA (DJOGO)                   | G    |
| NIOBLENI (TENEYA)                | G    |
| SEGUEYANA (SEHUN FULALA)         | G    |
| DJULELI                          | G    |
| GN07E2-6-V                       | G    |
| 00-SB-F5DT-30                    | GC   |
| CIRAD 406                        | GC   |
| WELI                             | GC   |
| NAFALENT5                        | GC   |
| NAFALENP6                        | GC   |
| LINA 3                           | GC   |
| 04-SIR-F5T-35                    | GC   |
| NIÉTA (97-SB-F5DT-74-2)          | GC   |
| 04-SIR-F5T-13-1                  | GC   |
| SANGATIGUI (98-BE-F5P-84)        | GC   |
| 97-SB-F5DT-150                   | GC   |
| 02-SB-FDT-30                     | GC   |
| ZARRABLEN                        | GC   |
| KENIKEBA                         | GC   |
| 01-CZ-F5P-263                    | GC   |
| 01-BE-F5P-15                     | GC   |
| ZARRADJE                         | GC   |
| 04-KANIKO-F5DT-26                | GC   |
| 00-SB-F5DT-127                   | GC   |
| 92-58                            | GC   |
| EL KURUMBASSAU                   | GC   |
| MOTA                             | GC   |
| EL RURUKA                        | GC   |
| 07-CZ-F5P-56                     | GC   |
| 03-SB-F5DT-132                   | GC   |
| 06-SB-F4DT-15                    | GC   |
| 07-SB-F5DT-55                    | GC   |
| 09-KO-F5DT-99-1                  | GC   |
| 09-SB-F5DT-77                    | GC   |
| 07-KO-F5DT-105                   | GC   |
| 09-SB-F5DT-141                   | GC   |
| 08-CZ-F5P-29 TYPE 92-1           | GC   |
| 09-CZ-F5P-138                    | GC   |
| 010-CZ-F4P-22 Ct                 | GC   |
| 08-CZ-F5P-63                     | GC   |
| 09-KO-F5DT-2                     | GC   |
| 09-KO-F5DT-142                   | GC   |
| 09-KO-F5DT-114-2                 | GC   |
| 09-SB-F5DT-111                   | GC   |
| 09-KO-F5DT-114-1                 | GC   |
| 09-CZ-F5P-1                      | GC   |
| 09-CZ-F5P-134                    | GC   |
| 09-BE-F5P-33                     | GC   |
| 09-CZ-F5P-129                    | GC   |
| 09-BE-F5P-5                      | GC   |
| (IS 15401*98-SB-F2-78)-3-1       | GC   |
| (IS 15401*98-SB-F2-78)-4-1       | GC   |
| (IS 15401*98-SB-F2-78)-5-4       | GC   |
| (IS 15401*98-SB-F2-78)-5-5       | GC   |
| (IS 15401*98-SB-F2-78)-5-9       | GC   |
| (IS 15401*98-SB-F2-78)-7-3       | GC   |
| (IS 15401*98-SB-F2-78)-7-5       | GC   |
| (IS 15401*98-SB-F2-78)-8-1       | GC   |
| (IS 15401*98-SB-F2-78)-8-1       | GC   |
| (IS 15401*98-SB-F2-78)-9-3       | GC   |
| (IS 15401*98-SB-F2-78)-9-5       | GC   |
| (IS 15401*MALISOR 92-1)-1-2      | GC   |
| (BERKU MANGA*02-SB-F4DT-298)-2-1 | GC   |
| SS07(DJIBRILS)SEL-27-1           | GC   |
| SS07(MADOUJ)SEY-42-V             | GC   |
| ND07 E2(17X30) F2-6-V            | GC   |
| V274_BOGOBA                      | GD   |
| LEPON RAKUMI-16                  | GD   |
| (SSV 20055*CGM 19/9-1-1)-1-1     | GD   |
| (SSV 20055*CGM 19/9-1-1)-2-2     | GD   |
